# Supplementary material for: Potential of Fatty Acids in Treating Sarcopenia: A Systematic Review
Source: MDPI journal article supplement (doi:10.3390/nu15163613), 2023-08-17
Supplement: s1 [file s1]

| RCTs   |                          |                      | Jadad Quality Assessment scale                                                                                                                |                    |
|--------|--------------------------|----------------------|-----------------------------------------------------------------------------------------------------------------------------------------------|--------------------|
| Number | study                    | Experimental design  | supplementation                                                                                                                               | Quality assessment |
| 1      | Roma el. (2015)          | RCT                  | n-3 PUFA+ Vit E<br>Vit E (Con)                                                                                                                | 3 (Medium)         |
| 2      | Mariasole el. (2017)     | RCT                  | n-3 PUFA<br>placebo (Con)<br>All with lower-limb resistance<br>exercise training                                                              | 4 (Good)           |
| 3      | Emelie el. (2019)        | RCT                  | resistance training and healthy<br>diet rich in N-3PUFAs (RT-HD),<br>resistance training only (RT)<br>controls (CON)                          | 3 (Medium)         |
| 4      | Stephen el. (2018)       | RCT                  | resistance training and<br>omega-3 (Exp)<br>placebo (Con)                                                                                     | 5 (High)           |
| 5      | Sebastiaan el.<br>(2021) | RCT                  | Resistance exercise and Omega-3<br>(Exp)<br>corn oil (Con)                                                                                    | 4 (Good)           |
| 6      | Stephan el. (2020)       | double-blind,<br>RCT | 1) 2000 IU vitamin D-3 per day;<br>2) 4000 mg CLA per day;<br>3) both Vit D (2000 IU/d) and<br>CLA (4000 mg/d); 4) placebo                    | 5 (High)           |
| 7      | Yves el. (2019)          | multi center, RCT    | 1) ω3-PUFA alone,<br>2) ω3-PUFA plus the<br>multidomain intervention 3) the<br>multidomain intervention plus<br>placebo,<br>4) placebo alone. | 5 (High)           |

|    |                     |                                                   |                                                                                                                                               |            |
|----|---------------------|---------------------------------------------------|-----------------------------------------------------------------------------------------------------------------------------------------------|------------|
| 8  | Jun el. (2016)      | double-blind RCT                                  | PUFA<br>corn oil (Con)                                                                                                                        | 4 (Good)   |
| 9  | Claire. el. (2021)  | single center,<br>parallel, double-<br>blind, RCT | Electrical Muscle Stimulation<br>Procedures+<br>1)placebo capsules<br>2)Whey protein isolate capsules<br>3)WPI+Omega-4+rutin, and<br>curcumin | 4 (Good)   |
| 10 | Gordon. el. (2015)  | double-blind RCT                                  | Corn oil (CON)<br>n-3 PUFA group                                                                                                              | 3 (Medium) |
| 11 | Gordon. el. (2011)  | RCT                                               | omega-3 fatty acids (Exp)<br>corn oil(Con)                                                                                                    | 4 (Good)   |
| 12 | Stephen. el. (2009) | double-blind,<br>RCT                              | alpha-linolenic acid (ALA)<br>placebo (Con)                                                                                                   | 4 (Good)   |
| 13 | Mats el. (2020)     | double-blind,<br>RCT                              | Resistance exercise and<br>omega-3 (Exp)<br>placebo (Con)                                                                                     | 5 (High)   |

---
