# Supplementary material for: Potential of Fatty Acids in Treating Sarcopenia: A Systematic Review
Source: MDPI journal article supplement (doi:10.3390/nu15163613), 2023-08-17
Supplement: s1 [file s1]

## Embase

1 fatty acid/ or lipid/ or essential fatty acid/ or hydroxy fatty acid/ or long chain fatty acid/ or medium chain fatty acid/ or short chain fatty acid/ or unsaturated fatty acid/

2 sarcopenia/dt, pc, su, th [Drug Therapy, Prevention, Surgery, Therapy]

1 and 2

## Pubmed

1 (fatty acid/ or lipid/ or essential fatty acid/ or hydroxy fatty acid/ or long chain fatty acid/ or medium chain fatty acid/ or short chain fatty acid/ or unsaturated fatty acid/) AND ((sarcopenia) OR (sarcopenic)) (fatty acid/ or lipid/ or essential fatty acid/ or hydroxy fatty acid/ or long chain fatty acid/ or medium chain fatty acid/ or short chain fatty acid/ or unsaturated fatty acid/) AND ((sarcopenia) OR (sarcopenic))

## Web of Science

1 (((((((ALL=(fatty acid)) OR ALL=(lipid)) OR ALL=(essential fatty acid)) OR ALL=(hydroxy fatty acid)) OR ALL=(long chain fatty acid)) OR ALL=(medium chain fatty acid)) OR ALL=(short chain fatty acid)) OR ALL=(unsaturated fatty acid

2 ALL=(sarcopenia)

3 ((ALL=(diet therapy)) OR ALL=(drug therapy)) OR ALL=(Therapy)

#3 AND #2 AND #1
