# Supplementary material for: Potential of Fatty Acids in Treating Sarcopenia: A Systematic Review
Source: MDPI journal article supplement (doi:10.3390/nu15163613), 2023-08-17
Supplement: s1 [file s1]

| Full text                                             | Abbreviations |
|-------------------------------------------------------|---------------|
| B-cell lymphoma 2                                     | BCL2          |
| bcl-2-like protein 4                                  | BAX           |
| Caspase-3                                             | CASP3         |
| Caspase-7                                             | CASP7         |
| Caspase-9                                             | CASP9         |
| Control group                                         | Con           |
| Cytochrome b-c1 complex subunit 1                     | UQCRC1        |
| Experiment group                                      | Exp           |
| Forkhead box protein M1                               | FOXM1         |
| Forkhead box protein O1                               | FOXO1         |
| Glycogen synthase kinase-3 beta                       | GSK3 $\beta$  |
| Histone deacetylase 4                                 | HDAC-4        |
| Insulin-like growth factor 2                          | IGF-II        |
| Insulin-like growth factor-binding protein 5          | IGFBP-5       |
| Interleukin 6                                         | IL-6          |
| Interleukin-1 beta                                    | IL-1 $\beta$  |
| Mammalian target of rapamycin                         | mTOR          |
| Microtubule-associated proteins 1A/1B light chain 3B  | LC3b          |
| Mitochondrial uncoupling protein 3                    | UCP3          |
| Muscle mass                                           | MM            |
| Muscle performance                                    | MP            |
| Muscle strength                                       | MS            |
| Myosin heavy chain 2                                  | MYH2          |
| Myosin heavy chain 4                                  | MYH4          |
| Myosin heavy chain 7                                  | MYH7          |
| Nuclear receptor co-repressor 1                       | NCOR1         |
| Post-intervention                                     | Po            |
| Pre-intervention                                      | Pre           |
| Protein kinase B                                      | Akt           |
| RAC(Rho family)-alpha serine/threonine-protein kinase | AKT1          |
| Randomized Controlled Trial                           | RCT           |
| Tumor necrosis factor- $\alpha$                       | TNF- $\alpha$ |
| Vitamin e                                             | Vit E         |
