# Supplementary material for: Potential of Fatty Acids in Treating Sarcopenia: A Systematic Review
Source: MDPI journal article supplement (doi:10.3390/nu15163613), 2023-08-17
Supplement: s1 [file s1]

| <u>Study ID</u>       | <u>D1</u> | <u>D2</u> | <u>D3</u> | <u>D4</u> | <u>D5</u> | <u>Overall</u> |                                               |
|-----------------------|-----------|-----------|-----------|-----------|-----------|----------------|-----------------------------------------------|
| Claire. el. (2021)    | +         | +         | +         | +         | !         | !              | + Low risk                                    |
| Emelie el. (2019)     | -         | +         | +         | +         | !         | -              | ! Some concerns                               |
| Gordon. el. (2011)    | +         | +         | +         | +         | !         | !              | - High risk                                   |
| Gordon. el. (2015)    | +         | +         | +         | !         | !         | !              |                                               |
| Jun el. (2016)        | -         | +         | +         | +         | !         | -              | D1 Randomisation process                      |
| Mariasole el. (2017)  | +         | +         | +         | +         | !         | !              | D2 Deviations from the intended interventions |
| Mats el. (2020)       | +         | +         | +         | -         | !         | !              | D3 Missing outcome data                       |
| Roma el. (2015)       | -         | +         | +         | +         | !         | -              | D4 Measurement of the outcome                 |
| Sebastiaan el. (2021) | +         | +         | +         | +         | !         | !              | D5 Selection of the reported result           |
| Stephan el. (2020)    | +         | +         | +         | +         | +         | +              |                                               |
| Stephen el. (2018)    | +         | +         | +         | +         | +         | +              |                                               |
| Stephen. el. (2009)   | +         | +         | +         | +         | !         | !              |                                               |
| Yves el. (2019)       | +         | +         | +         | +         | +         | +              |                                               |
