# Supplementary material for: Potential of Fatty Acids in Treating Sarcopenia: A Systematic Review
Source: Nutrients. 2023 Aug 17;15(16):3613. doi: 10.3390/nu15163613 (PMC10459935; doi:10.3390/nu15163613)
Supplement: Supplementary file 1 [file nutrients-15-03613-s001.zip]

Archive with 7 entries (7 files):
- supplementary materials-sum.pdf
- supplementary materials1-search strategy.pdf
- supplementary materials2-Rob2.pdf
- supplementary materials3-abbreviations.pdf
- supplementary materials4-List of exclusive studies .pdf
- supplementary materials5-AMSTAR-2.pdf
- supplementary materials6-Jadad Quality Assessment.pdf
